# Supplementary material for: Commensal Pseudomonas strains facilitate protective response against pathogens in the host plant
Source: PubMed Central journal article supplement (PMC8986537; doi:10.1038/s41559-022-01673-7), 2022-02-24
Supplement: 41559_2022_1673_MOESM1_ESM.pdf [file 41559_2022_1673_MOESM1_ESM.pdf]

---

**Supplementary information**

---

**Commensal *Pseudomonas* strains facilitate protective response against pathogens in the host plant**

---

In the format provided by the authors and unedited

## Supplemental Material for

### Shalev et al.: Commensal *Pseudomonas* strains facilitate protective response against pathogens in the host plant

#### Supplementary Data 1. RNA-seq expression measurements.

#### Supplementary Table 1. Metadata and barcode sequences for the 14 isolates.

| Isolate | Name in this study | ATUE         | Type      | Location | Barcode                            | Similar isolates in Karasov et al. (2018) collection* |
|---------|--------------------|--------------|-----------|----------|------------------------------------|-------------------------------------------------------|
| p4.C9   | P1                 | ATUE5        | Pathogen  | Eyach    | GTATCTGTAAGAAAAA<br>TCGATTTCCAGGC  | 23                                                    |
| p3.A5   | P2                 | ATUE5        | Pathogen  | Eyach    | GTATGCTGAAAAACAAA<br>CTATTTGCTTGGC | 115                                                   |
| p3.A9   | P3                 | ATUE5        | Pathogen  | Eyach    | GTATAGTAAAGCACAA<br>GAAATTGTCGGGC  | 24                                                    |
| p3.B12  | P4                 | ATUE5        | Pathogen  | Eyach    | GTATGCCAAAGATGAA<br>CTACTTGTCTGGC  | 156                                                   |
| p4.A6   | P5                 | ATUE5        | Pathogen  | Eyach    | GTATGAAGAAGATGAA<br>TCATTTACCTGGC  | 236                                                   |
| p4.E1   | P6                 | ATUE5        | Pathogen  | Eyach    | GTATCCGCAAACGTAA<br>GCACTTAGACGGC  | 196                                                   |
| p4.G8   | P7                 | ATUE5        | Pathogen  | Eyach    | GTATAGGTAATAAGAA<br>AGCCTTATACGGC  | 168                                                   |
| p5.H10  | C1                 | ATUE-<br>NEW | Commensal | Eyach    | GTATCGCCAACACGAA<br>CCCGTTAAATGGC  | 5                                                     |
| p3.G10  | C2                 | ATUE-<br>NEW | Commensal | Eyach    | GTATACCCAACACCAA<br>GCCCTTATCGGGC  | 5                                                     |
| p4.C4   | C3                 | ATUE4        | Commensal | Eyach    | GTATCTTGAATTCTAA<br>CCGTTTACCCGGC  | 17                                                    |
| p4.H11  | C4                 | ATUE2        | Commensal | Det-2    | GTATAGAAAAATGAAAA<br>GATGTTCTCTGGC | 23                                                    |
| p4.H10  | C5                 | ATUE2        | Commensal | Det-2    | GTATCCAGAAGCTGCAA<br>CAGCTTTACAGGC | 12                                                    |
| p3.G11  | C6                 | ATUE2        | Commensal | Eyach    | GTATCACTAACAGGAA<br>CTCTTTCCCTGGC  | 17                                                    |
| p5.F2   | C7                 | ATUE2        | Commensal | Eyach    | GTATCACTAAGGATAA<br>TCCGTTTTATGGC  | 6                                                     |

†OTU classification from Karasov et al. (2018)

\*nucleotide sequence divergence < 0.0001 in core genome

**Supplementary Table 2. Analysis of batch effects and synthetic community composition. A.** Analysis of similarities (ANOSIM) based on Bray-Curtis distances for composition of the 14 barcoded bacteria in treated hosts. The analysis was constrained by the host genotype in each experimental batch (exp) to estimate its effect on the explained variance. **B.** Multilevel pairwise comparison of synthetic community composition for the different *A. thaliana* genotypes, using adonis based on Bray-Curtis distances. Data derived from one representative experiment (October 2018). Statistically significant differences ( $P < 0.05$ ) in bold.

| A. ANOSIM |        |               |              |  |
|-----------|--------|---------------|--------------|--|
| Treatment | R      | Pr(>f)        | Experiment   |  |
| PathoCom  | 0.0630 | <b>0.0175</b> | August 2018  |  |
|           | 0.1792 | <b>0.0005</b> | October 2018 |  |
| CommenCom | 0.0622 | 0.0615        | August 2018  |  |
|           | 0.1761 | <b>0.0005</b> | October 2018 |  |
| MixedCom  | 0.0538 | <b>0.0265</b> | August 2018  |  |
|           | 0.0951 | <b>0.0005</b> | October 2018 |  |

  

| B. Pairwise comparison of synthetic community composition |        |                  |           |           |
|-----------------------------------------------------------|--------|------------------|-----------|-----------|
| Treatment                                                 | R      | P <sub>adj</sub> | Genotype1 | Genotype2 |
| PathoCom                                                  | 0.1491 | 0.005            | Ey15-2    | HE-1      |
|                                                           | 0.2561 | <b>0.001</b>     | Ey15-2    | Lu3-30    |
|                                                           | 0.1236 | <b>0.01</b>      | Ey15-2    | Schl-7    |
|                                                           | 0.0804 | <b>0.044</b>     | HE-1      | Kus3-1    |
|                                                           | 0.1678 | <b>0.001</b>     | HE-1      | Lu3-30    |
|                                                           | 0.1313 | <b>0.001</b>     | Kus3-1    | Lu3-30    |
|                                                           | 0.0757 | <b>0.049</b>     | Kus3-1    | Schl-7    |
|                                                           | 0.0865 | <b>0.002</b>     | Lu3-30    | Schl-7    |
| CommenCom                                                 | 0.1986 | <b>0.001</b>     | Lu3-30    | Tue-Wal-2 |
|                                                           | 0.0813 | <b>0.035</b>     | Ey15-2    | Lu3-30    |
|                                                           | 0.1285 | <b>0.028</b>     | Ey15-2    | Tue-Wal-2 |
|                                                           | 0.1330 | <b>0.004</b>     | HE-1      | Lu3-30    |
|                                                           | 0.2450 | <b>0.001</b>     | HE-1      | Tue-Wal-2 |
|                                                           | 0.2197 | <b>0.001</b>     | Kus3-1    | Lu3-30    |
|                                                           | 0.1305 | <b>0.005</b>     | Kus3-1    | Schl-7    |
|                                                           | 0.1709 | <b>0.007</b>     | Kus3-1    | Tue-Wal-2 |
| MixedCom                                                  | 0.4401 | <b>0.001</b>     | Lu3-30    | Tue-Wal-2 |
|                                                           | 0.3788 | <b>0.001</b>     | Schl-7    | Tue-Wal-2 |
|                                                           | 0.0825 | <b>0.012</b>     | Ey15-2    | Lu3-30    |
|                                                           | 0.0818 | <b>0.01</b>      | Ey15-2    | Tue-Wal-2 |
|                                                           | 0.0673 | <b>0.027</b>     | HE-1      | Tue-Wal-2 |
|                                                           | 0.1660 | <b>0.001</b>     | Kus3-1    | Lu3-30    |

---

|  |        |              |        |           |
|--|--------|--------------|--------|-----------|
|  | 0.2283 | <b>0.001</b> | Lu3-30 | Tue-Wal-2 |
|--|--------|--------------|--------|-----------|

---

**Supplementary Table 3. Model tests. A.** Importance of plant genotype, treatment and their interaction (genotype\*treatment), estimated by model comparison using leave-one-out cross-validation. Preferred model in bold. **B.** Two-way ANOVA test for the model [weight ~ genotype \* treatment + genotype + treatment + experiment]. Statistically significant relationships ( $P < 0.05$ ) in bold.

| <b>A. Model comparisons using leave-one-out cross-validation</b> |                                                                          |                                            |                |                |                      |
|------------------------------------------------------------------|--------------------------------------------------------------------------|--------------------------------------------|----------------|----------------|----------------------|
|                                                                  | <b>tested factor: <u>genotype</u></b>                                    |                                            |                |                |                      |
|                                                                  | <b>model 1</b>                                                           | model 2                                    |                |                |                      |
|                                                                  | <b>weight ~ genotype + treatment + experiment</b>                        | weight ~ treatment + experiment            |                |                |                      |
| expected log predictive density                                  | -335                                                                     |                                            |                |                |                      |
| standard error                                                   | 21.3                                                                     |                                            |                |                |                      |
|                                                                  | <b>tested factor: <u>treatment</u></b>                                   |                                            |                |                |                      |
|                                                                  | <b>model 1</b>                                                           | model 2                                    |                |                |                      |
|                                                                  | <b>weight ~ genotype + treatment + experiment</b>                        | weight ~ genotype + experiment             |                |                |                      |
| expected log predictive density                                  | -104.3                                                                   |                                            |                |                |                      |
| standard error                                                   | 13                                                                       |                                            |                |                |                      |
|                                                                  | <b>tested factor: <u>genotype*treatment</u></b>                          |                                            |                |                |                      |
|                                                                  | <b>model 1</b>                                                           | model 2                                    |                |                |                      |
|                                                                  | <b>weight ~ genotype * treatment + genotype + treatment + experiment</b> | weight ~ genotype + treatment + experiment |                |                |                      |
| expected log predictive density                                  | -23.2                                                                    |                                            |                |                |                      |
| standard error                                                   | 7.9                                                                      |                                            |                |                |                      |
| <b>B. Two-way ANOVA test</b>                                     |                                                                          |                                            |                |                |                      |
|                                                                  | <b>Df</b>                                                                | <b>Sum Sq</b>                              | <b>Mean Sq</b> | <b>F value</b> | <b>Pr(&gt;F)</b>     |
| <b>genotype</b>                                                  | 5                                                                        | 2.28093                                    | 0.45619        | 198.417        | <b>&lt; 2.20E-16</b> |
| <b>treatment</b>                                                 | 3                                                                        | 0.56645                                    | 0.18882        | 82.1251        | <b>&lt; 2.20E-16</b> |
| <b>experiment</b>                                                | 1                                                                        | 0.06414                                    | 0.06414        | 27.8961        | <b>1.57E-07</b>      |
| <b>genotype:treatment</b>                                        | 15                                                                       | 0.12689                                    | 0.00846        | 3.6795         | <b>2.55E-06</b>      |

**Supplementary Table 4. Estimation of *A. thaliana* host genotype importance in abundance changes in MixedCom.** Two models were compared: [ $\log_{10}(\text{cumulative isolate load}) \sim \text{treatment} + \text{genotype} + \text{experiment} + \text{error}$ ] and [ $\log_{10}(\text{cumulative isolate load}) \sim \text{treatment} * \text{genotype} + \text{treatment} + \text{genotype} + \text{experiment} + \text{error}$ ]; thus the genotype \* treatment coefficients were estimated for each barcoded isolate separately. Numbers are (expected log predictive density , standard error). Preferred model in bold.

| Isolate | treatment * genotype | treatment + genotype |
|---------|----------------------|----------------------|
| P1      | (-4.59 , 1.18)       | <b>(0 , 0)</b>       |
| P2      | (-1.71 , 2.51)       | <b>(0 , 0)</b>       |
| P3      | (-4.47 , 1.03)       | <b>(0 , 0)</b>       |
| P4      | (-2.89 , 2.15)       | <b>(0 , 0)</b>       |
| P5      | (-4.25 , 1.01)       | <b>(0 , 0)</b>       |
| P6      | (-2.96 , 1.9)        | <b>(0 , 0)</b>       |
| P7      | (-3.29 , 1.86)       | <b>(0 , 0)</b>       |
| C1      | (-3.3 , 1.58)        | <b>(0 , 0)</b>       |
| C2      | (-3.5 , 1.66)        | <b>(0 , 0)</b>       |
| C3      | (-0.68 , 2.56)       | <b>(0 , 0)</b>       |
| C4      | (-1.64 , 2.36)       | <b>(0 , 0)</b>       |
| C5      | (-0.78 , 2.59)       | <b>(0 , 0)</b>       |
| C6      | (-1.78 , 2.37)       | <b>(0 , 0)</b>       |
| C7      | (-1.97 , 2.17)       | <b>(0 , 0)</b>       |

**Supplementary Table 5. List of Differentially expressed genes (DEGs).** Related to Figure 5A. Separate .xlsx file.

**Supplementary Table 6. Overrepresented GO categories.** Related to Figure 5B. Separate .xlsx file.

**Supplementary Table 7. *Arabidopsis thaliana* accessions used.**

| <b>1001<br/>Genomes ID</b> | <b>Name</b> | <b>Latitude</b> | <b>Longitude</b> | <b>k-group</b> |
|----------------------------|-------------|-----------------|------------------|----------------|
| 9769                       | HE-1        | 48.55           | 8.99             | 2              |
| 9782                       | Lu3-30      | 48.53           | 9.09             | 2              |
| 9802                       | Kus3-1      | 48.51           | 9.11             | 2              |
| 9807                       | Schl-7      | 48.6            | 9.22             | 2              |
| 9994                       | Ey15-2      | 48.43           | 8.77             | 2              |
| 10002                      | Tue-Wal2    | 48.53           | 9.04             | 2              |

**Supplementary Table 8. Oligonucleotides used.**

| Name               | Sequence                                                                                       | Purpose                | Remarks         |
|--------------------|------------------------------------------------------------------------------------------------|------------------------|-----------------|
| Bar1               | GAATTCCTCGAGGTATCGCCTCCCTCGGCCATCAGCCNNNNA<br>ANNNNTTNNNNTTNNNNATACATGACTGCTGTCCGCACAAGGG<br>C | Barcode preparation    |                 |
| Bar2               | GGTACCGAGCTCCTATGCGCCTTGCCAGCCCGCTCAGGCCCTT<br>GTGCCGACAGCAGTCATGT                             | Barcode preparation    |                 |
| p1                 | GACATTCATCCGGGGTCAGC                                                                           | Barcode validation     |                 |
| p2                 | GTACCGGGCCCAAGCTTCTC                                                                           | Barcode validation     |                 |
| p3                 | GTGACTGGAGTTTCAGACGTGTGCTCTTCCGATCTTGCAGGGCT<br>TCCCAACCTTA                                    | Barcode-PCR first step |                 |
| p4                 | ACACTCTTTCCCTACACGACGCTCTTCCGATCTCCTCCCTCGC<br>GCCATCAG                                        | Barcode-PCR first step | No frameshift   |
| p5                 | ACACTCTTTCCCTACACGACGCTCTTCCGATCTACCTCCCTCG<br>CGCCATCAG                                       | Barcode-PCR first step | 1 bp frameshift |
| p6                 | ACACTCTTTCCCTACACGACGCTCTTCCGATCTGACCTCCCTC<br>GCGCCATCAG                                      | Barcode-PCR first step | 2 bp frameshift |
| p7                 | ACACTCTTTCCCTACACGACGCTCTTCCGATCTCGACCTCCCT<br>CGCGCCATCAG                                     | Barcode-PCR first step | 3 bp frameshift |
| p8                 | ACACTCTTTCCCTACACGACGCTCTTCCGATCTTCGACCTCCC<br>TCGCGCCATCAG                                    | Barcode-PCR first step | 4 bp frameshift |
| p9                 | ACACTCTTTCCCTACACGACGCTCTTCCGATCTTCGAGCCTCC<br>CTCGCGCCATCAG                                   | Barcode-PCR first step | 5 bp frameshift |
| p10                | AAGGGAATCAGGGGATCTTG                                                                           | Barcode-qPCR           |                 |
| p11                | CCTCCCTCGGCCATCAG                                                                              | Barcode-qPCR           |                 |
| p12                | ACATGCTTTGATACAGCGGTGA                                                                         | Plant-qPCR             | <i>GIGANTEA</i> |
| p13                | TGGATTCATTTAGTCCTTGAGG                                                                         | Plant-qPCR             | <i>GIGANTEA</i> |
| 515F-<br>hamPCR    | TCCCTACACGACGCTCTTCCGATCTTGAGTGYCAGCMGCCGC<br>GGTAA                                            | hamPCR                 | V4, 16S rDNA    |
| 799R-<br>hamPCR    | GGAGTTCAGACGTGTGCTCTTCCGATCTTGCMGGGTATCTAAT<br>CCKGTT                                          | hamPCR                 | V4, 16S rDNA    |
| At.Gl_F-<br>hamPCR | TCCCTACACGACGCTCTTCCGATCTGTAAGATAAATGGGTCA<br>TCTAA                                            | hamPCR                 | <i>GIGANTEA</i> |
| At.Gl_R-<br>hamPCR | GGAGTTCAGACGTGTGCTCTTCCGATCTTCTTCTGAACCGGT<br>GTATTC                                           | hamPCR                 | <i>GIGANTEA</i> |



## Supplementary Figures

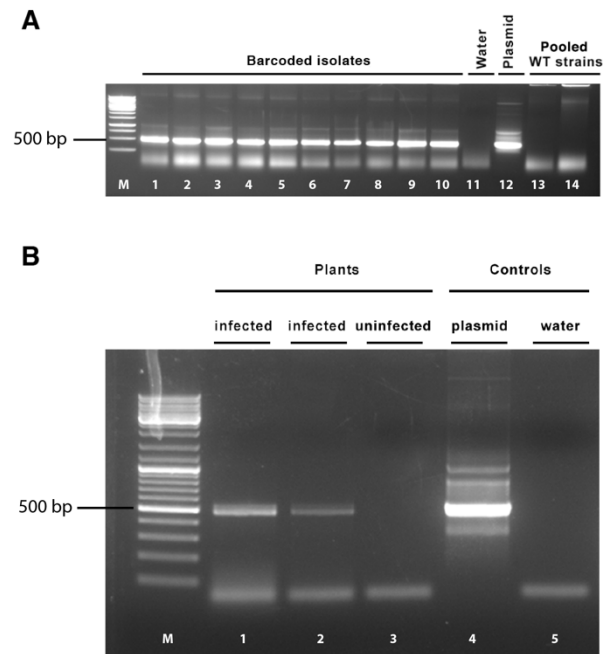

**Supplementary Figure 1. Validation of barcode integration and barcode-PCR specificity by agarose gel electrophoresis of PCR amplified products. A.** Validation of barcode integration to chosen isolates. Lanes 1–10 used DNA from examined barcoded isolates, lane 11 is water (negative control), lane 12 is the pUC18R6KT-mini-Tn7T plasmid into which a barcode was cloned (positive control), and lanes 13–14 are replicates of the 14 pooled parental (wild-type, WT) isolates. **B.** Validation of barcode-PCR specificity. Lanes 1–2 used DNA from plants infected with the 14 barcoded bacteria, lane 3 from an uninfected plant, lane 4 pUC18R6KT-mini-Tn7T plasmid (positive control), and lane 5 is water (negative control). Both infected and uninfected plants were grown in non-sterile conditions; barcode-specific primers yielded expected products of 522 bp. Lane M, DNA size marker. 500 bp marker indicated. For the unprocessed images see **Supplementary Figure10**.

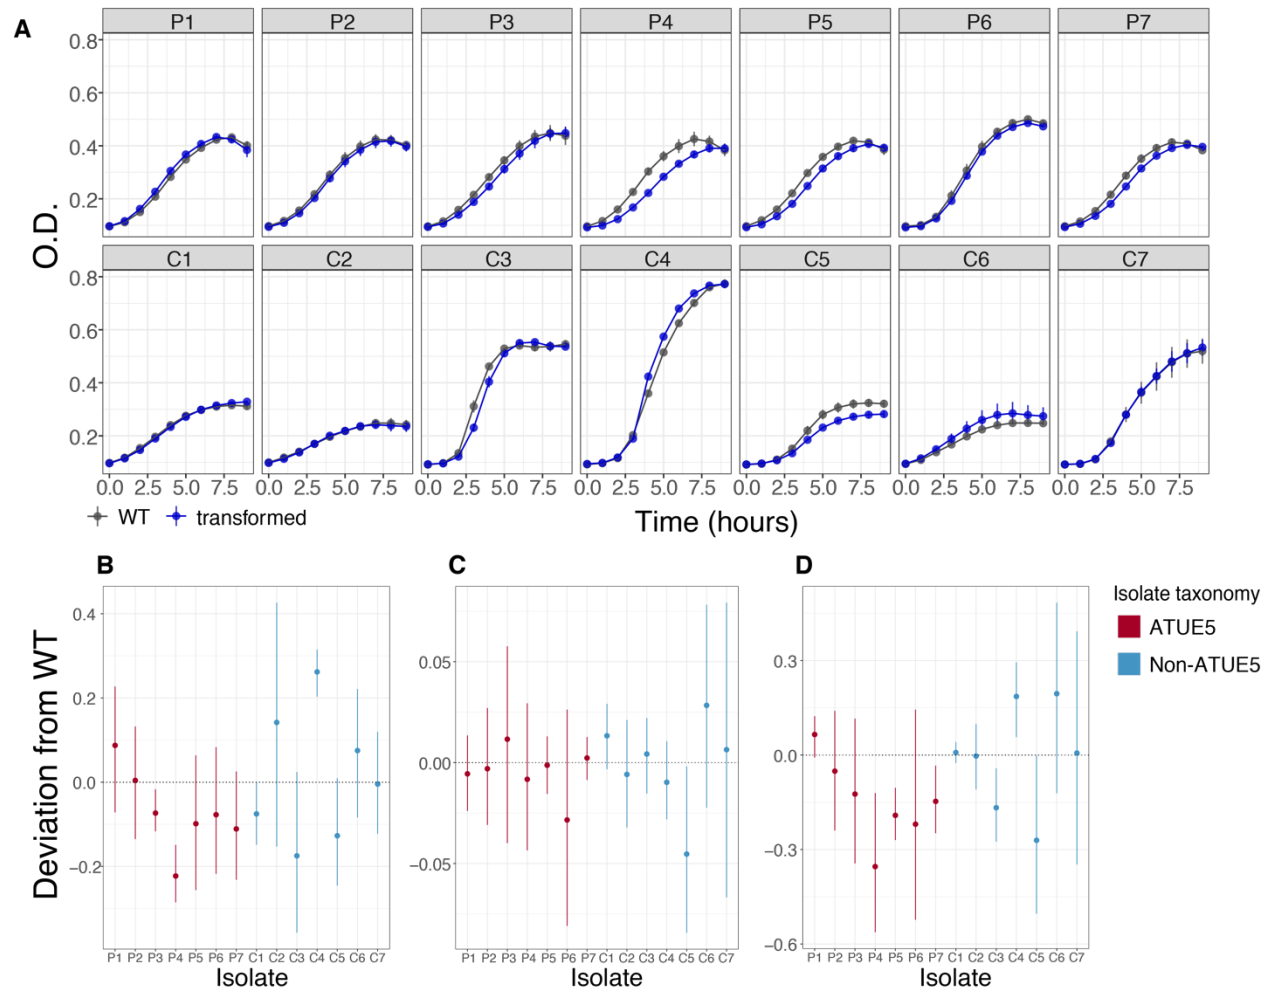

**Supplementary Figure 2. Comparison of growth characteristics between non-barcoded parental isolates and their barcoded derivatives.** **A.** Growth curves of the 14 parental isolates (WT) and their barcoded derivatives in Lysogeny broth (LB) over 10 hours, with  $OD_{600}$  recorded hourly. Mean  $\pm$  SD,  $n=3$ . Change of barcoded isolates in comparison to their corresponding parents in **B.** growth rate, **C.** carrying capacity, and **D.** area under the curve. All three growth parameters were derived from the original growth curves. Dotted line indicates the  $n$  parental baseline for a given quantity. Median estimates  $\pm$  95% Bayesian credible intervals,  $n=3$ .

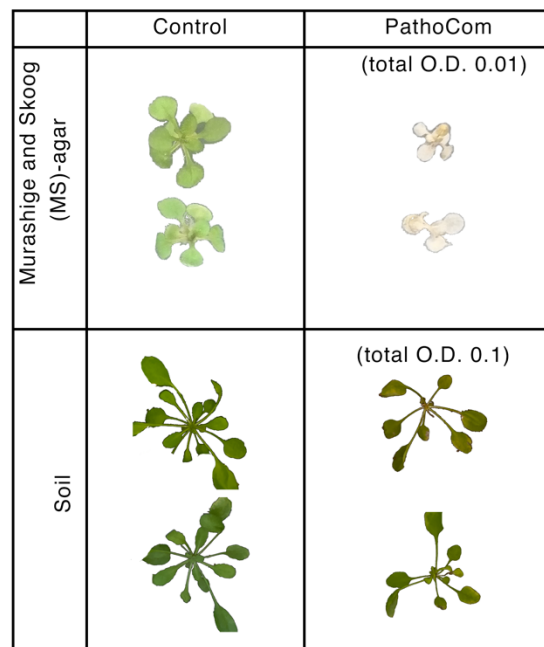

**Supplementary Figure 3. Illustrative photos of control- and PathoCom-treated plants, grown in either MS-agar (sterile) or soil (unsterile).** In both systems, the genotype Ey15-2 was used. For the MS-agar system, photos were taken 3-dpi, for the soil system 14-dpi. Sizes of plants are comparable within each system, but not between. Because images in the soil system were taken and parsed by pot automatically by a high-throughput imaging pipeline, some plant images were cropped.

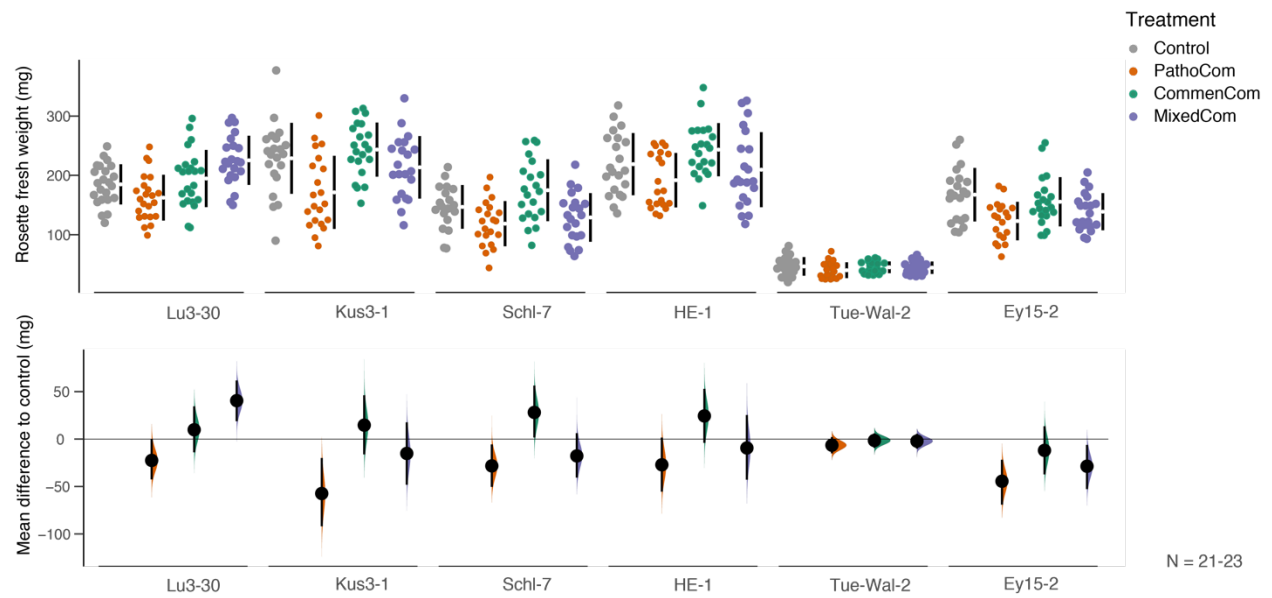

**Supplementary Figure 4. Protection by commensal *Pseudomonas* strains is host dependent.** Replicate experiment, related to Fig. 2 in main text. Each of the six *A. thaliana* genotypes used in this study was treated with Control, PathoCom, CommenCom and MixedCom. Fresh rosette weight was measured 12 dpi. The top panel presents the raw data, the breaks in the black vertical lines denote the mean value of each group, and the vertical lines themselves indicate standard deviation. The lower panel presents the mean difference to control, inferred from bootstrap sampling [32,33], indicating the distribution of effect sizes that are compatible with the data. 95% confidence intervals are indicated by the black vertical bars. n=21-23.

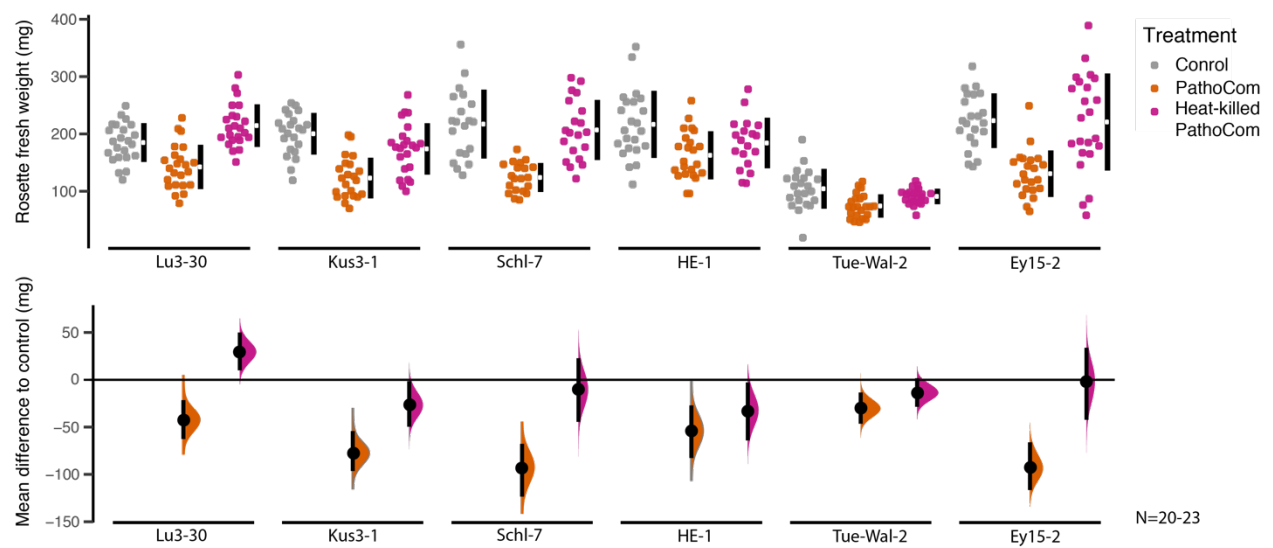

**Supplementary Figure 5. Fresh rosette weight of plants treated with Control, PathoCom or heat-killed PathoCom.** Each of the six *A. thaliana* genotypes used in this study was treated with control, PathoCom and heat-killed PathoCom inoculum, and fresh rosette weight was measured 12 dpi. The top panel presents the raw data, the breaks in the vertical black lines denote the mean value of each group, and the vertical lines themselves indicate standard deviation. The lower panel presents the mean differences to control, plotted as bootstrap sampling [32,33], indicating the distribution of effect sizes that are compatible with the data. 95% confidence intervals are indicated by the black vertical bars.

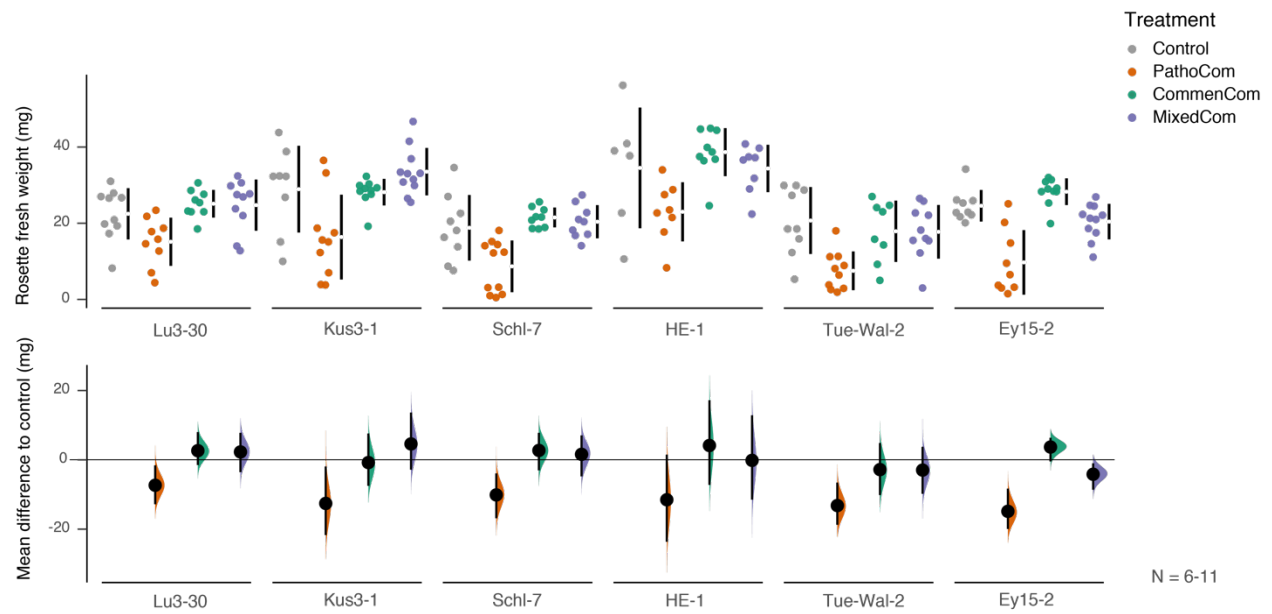

**Supplementary Figure 6. Protection by commensal *Pseudomonas* strains is host dependent in an axenic environment.** Each of the six *A. thaliana* genotypes used in this study was treated with Control, PathoCom, CommenCom and MixedCom. Fresh rosette weight was measured 7 dpi. The top panel presents the raw data, the breaks in the black vertical lines denote the mean value of each group, and the vertical lines themselves indicate standard deviation. The lower panel presents the mean difference to control, inferred from bootstrap sampling [32,33], indicating the distribution of effect sizes that are compatible with the data. 95% confidence intervals are indicated by the black vertical bars. Shown here are the results of one experiment. This experiment was performed in an axenic MS-agar system, while the other experiments in this study were done with non-sterile soil-grown plants. n=6-11.

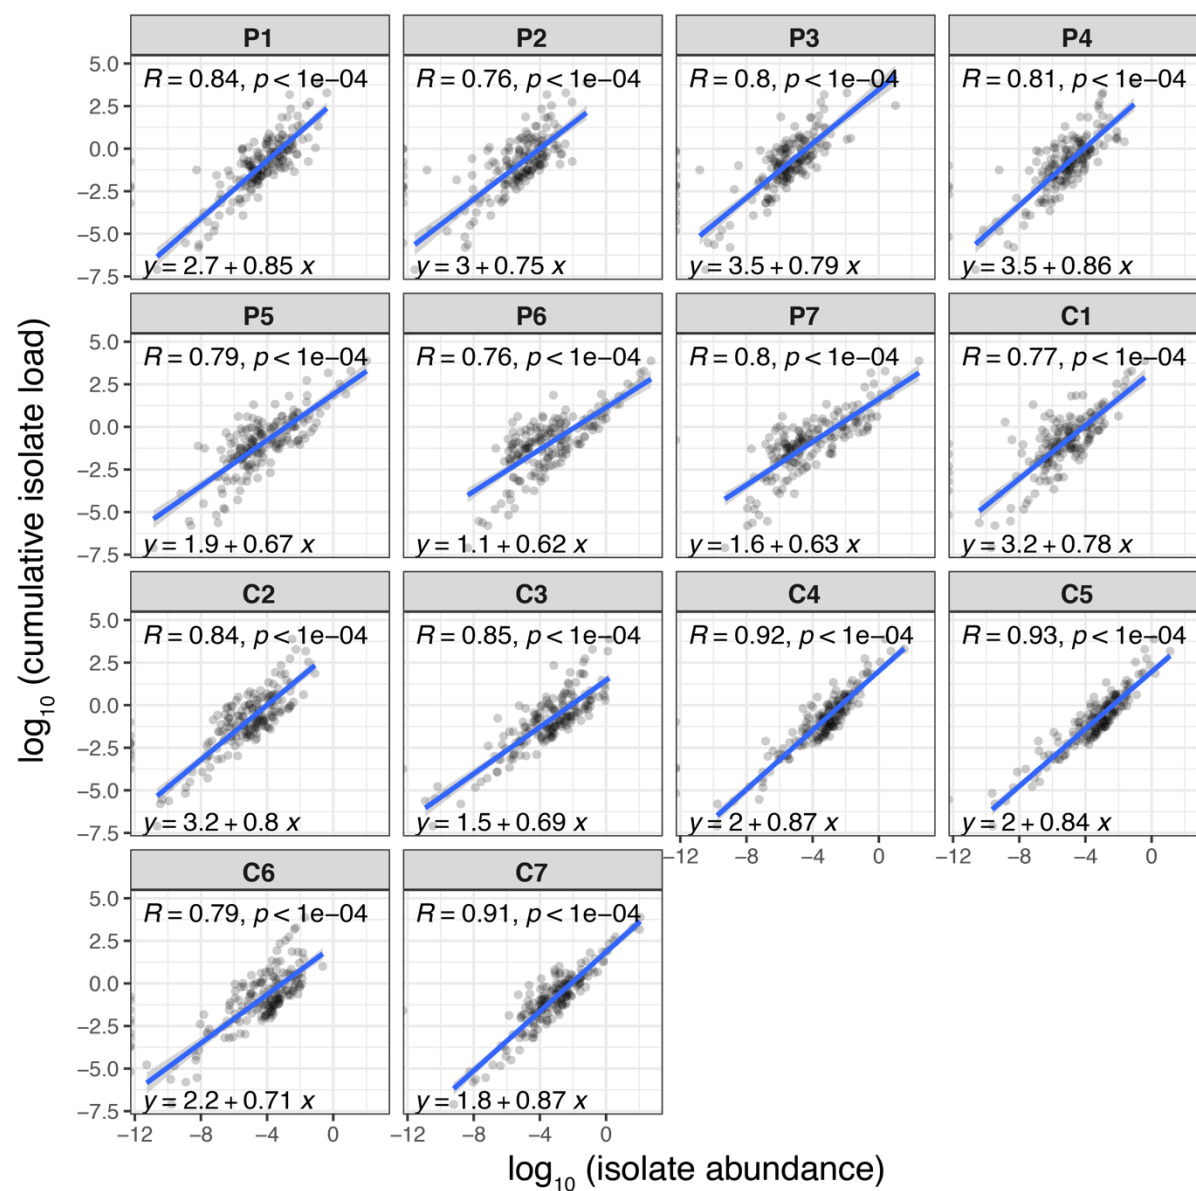

**Supplementary Figure 7. Correlations between the absolute abundance of each isolate and the cumulative bacterial abundance in MixedCom.** Each panel represents an individual isolate. Pearson correlation (R) and p-value (p) are given on top, and the matching linear equation at the bottom of each panel. Shaded areas indicate 95% confidence intervals of the correlation curve.

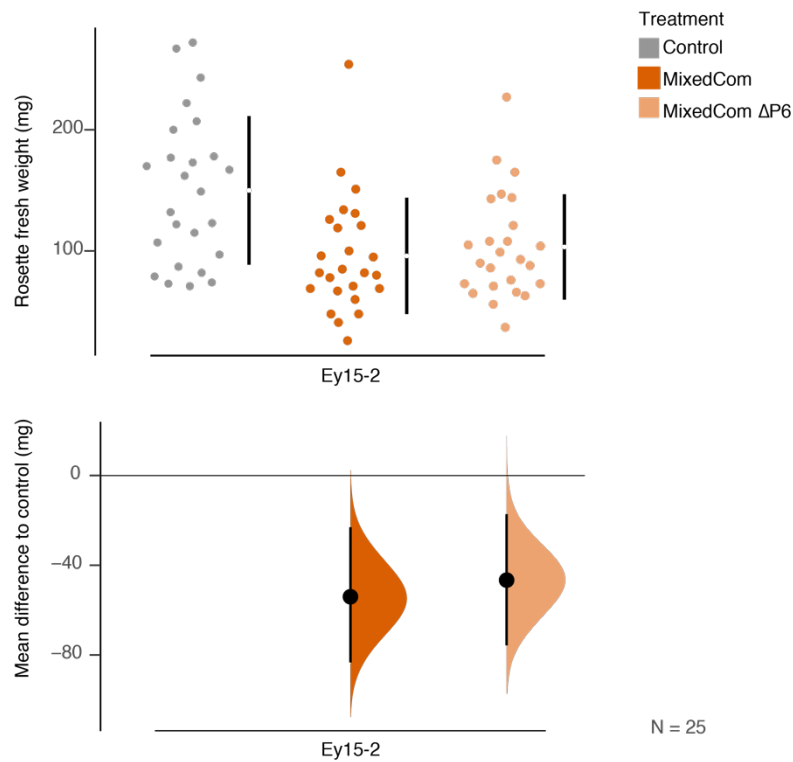

**Supplementary Figure 8. Fresh rosette weight of Ey15-2 plants treated with Control, PathoCom or PathoCom without P6 (PathoCom  $\Delta$ P6).** Fresh rosette weight was measured 12 dpi. The top panel presents the raw data, the breaks in the vertical black lines denote the mean value of each group, and the vertical lines themselves indicate standard deviation. The lower panel presents the mean differences to control, plotted as bootstrap sampling [32,33], indicating the distribution of effect sizes that are compatible with the data. 95% confidence intervals are indicated by the black vertical bars.  $n=25$ .



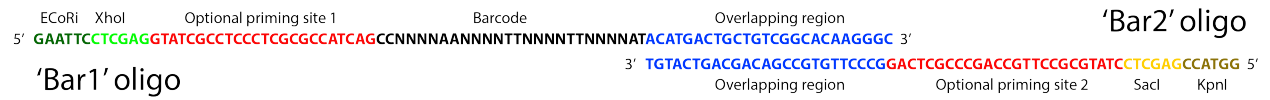

**Supplementary Figure 9. Illustration of barcode design.** Two single-stranded oligos were synthesized: 'Bar1' and 'Bar2'. N indicates random nucleotides.

A

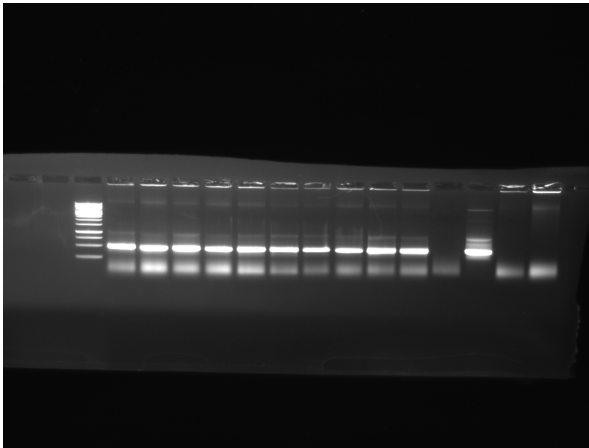

B

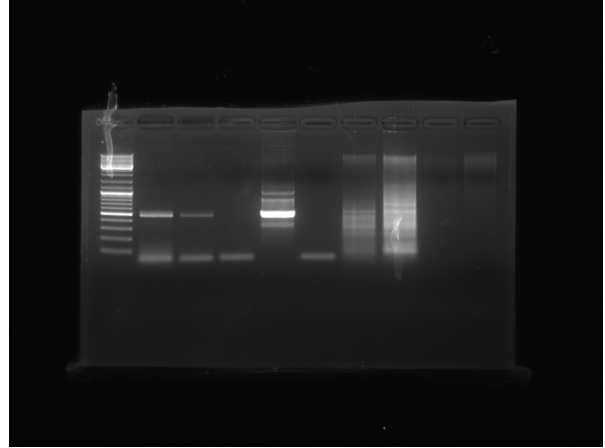

**Supplementary Figure 10. Unprocessed images of the gels used in Supplementary Figure 1. Panels A and B corresponds to the same panels in Supplementary Figure 1.**
